# Supplementary material for: Plant Tissue Culture Research and Development in Ethiopia: A Case Study on Current Status, Opportunities, and Challenges
Source: Hindawi journal article supplement (doi:10.1155/2021/9979549), 2021-08-03
Supplement: f1 [file 9979549.f1.zip]

Archive with 3 entries (3 files):
- 9979549.f1/Supplementary fiel 1 Assesment Questionnair.docx
- 9979549.f1/Supplementary fiel 2 Laboratory facility structure and design bottlenecks.docx
- 9979549.f1/Supplementary fiel 3 List of plant species which have been under plant tissue culture protocol optimization in Ethiopia.docx
