# Supplementary material for: Plant Tissue Culture Research and Development in Ethiopia: A Case Study on Current Status, Opportunities, and Challenges
Source: Hindawi journal article supplement (doi:10.1155/2021/9979549), 2021-08-03
Supplement: f1 [file 9979549.f1.zip › 9979549.f1/Supplementary fiel 1 Assesment Questionnair.docx]

**Supplementary file 1:** Questionnaire for the Assessment of Status, Potential and Challenges of Tissue Culture Research and Development in Ethiopia.

The questionnaire has the following five sections:

1. **Personal and institutional information**
2. **Human resource, infrastructure and equipment assessment**
3. **Current status and available technology**
4. **Future plan in terms of manpower and infrastructure**
5. **Collaboration and other activities related to tissue culture**

**I. Personal and institutional information**

1. Personal information (the person who fills the questioner)

Name ____________________________________Responsibility _____________________

E-mail________________________________ Cell Phone________________________

2. Name of the institute ____________________________________________

3. Type of institute

A. Public/Government B.NGO C. Private

D. International Organization E. Other________________________

4. When plant tissue culture started in your institute? (MM/year)__________________

5. Address (institute)

Region ____________________________________

City____________________________________

Tel ____________________________________

P.O. Box ____________________________________

E-mail ____________________________________

Fax ____________________________________

Website address ____________________________________

**II. Human resource, equipment and infrastructure assessment**

1. Do you have adequate tissue culture professionals?

A. Yes B. No

1. Fill the number and profile of tissue culture professionals working in your institute in table1.

**Table 1: Current status of TC professionals working in your lab**

| Responsibility | Number of professionals | | | | | | | | | |
| --- | --- | --- | --- | --- | --- | --- | --- | --- | --- | --- |
|  | Below Diploma | | Diploma | | BSc | | MSc | | PhD | |
| Male | Female | Male | Female | Male | Female | Male | Female | Male | Female |
| Director |  |  |  |  |  |  |  |  |  |  |
| Lab Managers |  |  |  |  |  |  |  |  |  |  |
| Researchers |  |  |  |  |  |  |  |  |  |  |
| Lab Technicians |  |  |  |  |  |  |  |  |  |  |
| Technical Assistants (Green house & screen house workers ) |  |  |  |  |  |  |  |  |  |  |
| Other (specify) |  |  |  |  |  |  |  |  |  |  |

1. Do you have an engineering / facility maintenance department (skilled man power, bioengineer or electro/mechanical engineer for maintenance and repair of tissue culture lab equipment and facility infrastructure)?
2. Yes B. No
3. If the answer for Q.No 3 is No, who does the facility and equipment maintenance work?

_________________________________ ____________________________________ _________________________________ ___________________________________

_________________________________ ____________________________________

1. List down main tissue culture laboratory equipment and facilities available in your institute

Table 2: Assessment of availability and functionality of laboratory equipment’s

| Equipment’s | Number | Functional | Not- functional |
| --- | --- | --- | --- |
| **Media preparation and autoclaving unit** |  |  |  |
| Autoclaves |  |  |  |
| Precision balances |  |  |  |
| pH Meter |  |  |  |
| Water purification apparatus |  |  |  |
| Refrigerated centrifuge |  |  |  |
| Deep Freezers (-20C) |  |  |  |
| Fridge/Freezer Comb |  |  |  |
| Hot plate with stirrer |  |  |  |
| Micro pipettes (sets) |  |  |  |
| Microwave oven |  |  |  |
| Rotary shaker |  |  |  |
| Water distiller (single) |  |  |  |
| Water distiller (double) |  |  |  |
| Others: |  |  |  |
|  |  |  |  |
|  |  |  |  |
| **Working area and growth room unit** |  |  |  |
| Laminar flow hood |  |  |  |
| Fume hood |  |  |  |
| Microscope stereo |  |  |  |
| Microscope dissecting |  |  |  |
| Tissue culture growth rooms |  |  |  |
| Others: |  |  |  |
|  |  |  |  |
|  |  |  |  |
| **Other accessories** |  |  |  |
| Ice maker |  |  |  |
| Indexing facility |  |  |  |
| Screen house |  |  |  |
| Bioreactor |  |  |  |
| Shakers |  |  |  |
| Others: |  |  |  |
|  |  |  |  |

1. Fill the amount and total areas of the lab parts in your tissue culture laboratory in table 3.

**Table 3: The current tissue culture laboratory capacity assessment**

| Laboratory part | | Number | Estimated total areas (m2) | Remark |
| --- | --- | --- | --- | --- |
| 1 | Cleaning room |  |  |  |
| 2 | Media preparation room |  |  |  |
| 3 | Transfer room |  |  |  |
| 4 | Growth room |  |  |  |
| 5 | Dark room |  |  |  |
| 6 | Green house |  |  |  |
| 7 | Screen house |  |  |  |
| 8 | Others (specify) |  |  |  |
| 9 | Media Storage Room |  |  |  |
|  |  |  |  |  |

1. Do you think that the current laboratory facility in your institute is appropriate and adequate for application of tissue culture procedures and techniques?

A. Yes B. No

1. If No, in which part of the lab has major problem please describe in table 3.

**Table 3: Major TC facility bottle necks that challenges research and development**

| Lab part | | Type of problems | | | | | |
| --- | --- | --- | --- | --- | --- | --- | --- |
| Missing  of the lab Part | Small  Space | Inappropriate Design | Lack of Basic Equipment | Lack of Maintenance | Others  (specify ) |
| 1 | Cleaning room |  |  |  |  |  |  |
| 2 | Media preparation room |  |  |  |  |  |  |
| 3 | Transfer room |  |  |  |  |  |  |
| 4 | Growth room |  |  |  |  |  |  |
| 5 | Dark room |  |  |  |  |  |  |
| 6 | Green house |  |  |  |  |  |  |
| 7 | Screen house |  |  |  |  |  |  |
| 8 | Media Storage Room |  |  |  |  |  |  |
| 9 | Others (specify) |  |  |  |  |  |  |
|  |  |  |  |  |  |  |  |
|  |  |  |  |  |  |  |  |

**III. Current status and available technology**

1. Is your laboratory involved in plant tissue culture research?

A. Yes B. No

1. If yes, please mention tissue culture research activities undertaking in your laboratory? (Title, PI, and status).

**Table 5: The status of plant tissue culture research activities**

| Research Title | Principal Investigator | Status of the experiment |
| --- | --- | --- |
|  |  |  |
|  |  |  |
|  |  |  |
|  |  |  |

1. Is your laboratory involved in plant tissue culture protocol adaptation, optimization and development?

A. Yes B. No

1. If yes, please mention below the status of plant tissue culture protocols in your laboratory

**Table 6: The status of plant TC protocol adaptation, optimization and development**

| Plant name | Explant used | Main purpose  (mass propagation, virus/ bacteria cleaning, conservation, etc) | Type of protocol  1=Adopted 2=optimized 3=developed | Status  1=scaled up 2=completed 3=ongoing |
| --- | --- | --- | --- | --- |
|  |  |  |  |  |
|  |  |  |  |  |

1. Is your laboratory involved in tissue culture propagated seedling /seeds distribution?
2. Yes B. No
3. If yes, please fill the information on distribution of seedlings/seeds in the last 5 years

**Table 7: Progress of TC propagated seedling/seed dispatched to farmers or users**

| Plant name | Amount of distributed seedling/ seeds per year | Year of distribution | Distributed to (Farmers, research center, *BoA, etc) |
| --- | --- | --- | --- |
|  |  |  |  |
|  |  |  |  |
|  |  |  |  |

***BoA= Bureau of Agriculture**

1. Is there any scientific publication or thesis on plant TC released from your laboratory?

A. Yes B. No

1. If yes, please list down the publications in Table 8.

**Table 8: Evaluation of availability on scientific papers and thesis work in TC**

| No | Title | Reference |
| --- | --- | --- |
|  |  |  |
|  |  |  |
|  |  |  |

1. Please scale the challenges of plant tissue culture research and development in your lab by indicating “X” for the appropriate scale.

**Table 9: Challenges of plant tissue culture research and development**

| Challenges | | *1= No challenge, 2= low 3=moderate 4= highly challenging* | | | |
| --- | --- | --- | --- | --- | --- |
| 1 | 2 | 3 | 4 |
| 1 | Availability of reasonable number of skilled and experienced TC professionals |  |  |  |  |
| 2 | Availability of tissue culture infrastructure |  |  |  |  |
| 3 | Accessibility of chemicals and  reagents in local market |  |  |  |  |
| 4 | Procurement procedure particularly for purchase of consumables |  |  |  |  |
| 5 | Availability of national and/or regional policy frameworks to support private sector involvement in tissue culture |  |  |  |  |
| 6 | Limited public/farmers awareness about proven tissue culture products and technologies |  |  |  |  |
| 7 | Weak collaborative linkages and/or partnership among the different stakeholders along the tissue culture development and delivery pipeline. |  |  |  |  |
| 8 | Budget availability |  |  |  |  |
| 9 | Laboratory equipment maintenance |  |  |  |  |
| 10 | Staff turnover |  |  |  |  |
| 11 | Low efficiency at various steps in process |  |  |  |  |
|  | Others specify |  |  |  |  |

**IV. Future plan in terms of manpower and infrastructure**

1. Is your institute having any plan to hire additional TC professional employee in the coming 5 years**?**
2. Yes B. No
3. If yes please fill the information of the proposed new tissue culture professionals

**Table 10: Future plan in terms of TC professional employment in the coming 5 years**

| Educational Qualification (BSc/MSc/PhD and other) | New employee  Number | Responsibility  (Researcher, Lab technicians and others) |
| --- | --- | --- |
|  |  |  |
|  |  |  |
|  |  |  |

1. Is your institute having any plan to upgrade the current TC professional employee in the coming 5 years**?**
2. Yes B. No
3. If yes please fill the information of the proposed upgraded TC professionals

**Table 11: Future plan in TC professional employee upgrading in the coming 5 years**

| Upgrade to (BSc/MSc/PhD and other) | Number | Responsibility  (Researcher, Lab technicians and others) |
| --- | --- | --- |
|  |  |  |
|  |  |  |
|  |  |  |
|  |  |  |
|  |  |  |
|  |  |  |

1. Is your institute having any plan to improve the capacity of TC lab in the coming 5 years?
2. Yes B. No
3. If yes, please specify the planned improvement to each part of the lab in Table 12.

**Table 12: Future plan in TC lab infrastructure improvement in the coming 5 years**

| Lab part | | Type of upgrading | | | |
| --- | --- | --- | --- | --- | --- |
| Increasing space (additional room building) | Equipping the lab with additional lab equipment | Maintenance of un-functional equipment’s | Others  (specify ) |
| 1 | Cleaning room |  |  |  |  |
| 2 | Media preparation room |  |  |  |  |
| 3 | Transfer room |  |  |  |  |
| 4 | Growth room |  |  |  |  |
| 5 | Dark room |  |  |  |  |
| 6 | Green house |  |  |  |  |
| 7 | Screen house |  |  |  |  |
| 8 | Others (specify) |  |  |  |  |
|  |  |  |  |  |  |

**V. Collaboration and other activities related to tissue culture.**

1. Do you have any collaborator regarding tissue culture activities
2. Yes B. No
3. If yes, please mention your collaborators and specify the type of support you get from these collaborators (technical, technology transfer, training, funding, material, germplasm etc.)

**Table 13: Collaboration on plant tissue culture research and development**

| Collaborator | | Reason for collaboration |
| --- | --- | --- |
|  |  |  |
|  |  |  |

1. Can you name the source of lab equipment and lab reagent suppliers for your tissue culture research activities?

**Table 14: Assessment of laboratory reagents and equipment suppliers**

|  | Lab Equipment Supplier | Lab reagent and Chemical Supplier |
| --- | --- | --- |
| **You can name any source** |  |  |
|  |  |
|  |  |
|  |  |
|  |  |
|  |  |

1. Please indicate the application level of the following activities which related to tissue culture research and development in your institute?

**Table 15: Assessment of other activities related to tissue culture**

| No |  | No | Low  extent | Moderate extent | High extent |
| --- | --- | --- | --- | --- | --- |
| 1 | Giving plant TC technicians hand on training for different target groups( students, laboratory technicians, researchers etc) |  |  |  |  |
| 2 | Coach and mentor researchers and students on the use plant tissue culture tools and research techniques. |  |  |  |  |
| 3 | Promote the adoption and practical application of plant tissue culture techniques in plant production |  |  |  |  |
| 4 | Provide marketing information and access. |  |  |  |  |
