# Supplementary material for: Plant Tissue Culture Research and Development in Ethiopia: A Case Study on Current Status, Opportunities, and Challenges
Source: Hindawi journal article supplement (doi:10.1155/2021/9979549), 2021-08-03
Supplement: f1 [file 9979549.f1.zip › 9979549.f1/Supplementary fiel 2 Laboratory facility structure and design bottlenecks.docx]

### Supplementary file 2

### Laboratory facility structure and design bottlenecks in different laboratory compartment

| **Name of institute** | **Challenges in the laboratory compartment** | | | | |
| --- | --- | --- | --- | --- | --- |
| Absent of lab compartment | Small space | Inappropriate design | Lack of basic equipment | Lack of maintenance |
| NABC | DR and MS | CR,TR GR | CR and GR | All lab part except CR | All |
| JARC |  | MP, MS | CR, TR,GR,GH,SH | GH,SH | GH,SH |
| MARC |  | MP,TR,GR | MP,TR,GR | MP,TR,GR | DR |
| DARC |  |  |  |  |  |
| ARARI, Bahirdar TC | DR | MP,MS,GR | CL and TR |  | GR and MP |
| ORARI, Adami tulu Agricultural Research center | DR,SH, MS | CR |  | MP | GH |
| (SRARI) Areka Agricultural Research center | DR and GH | CR | SH | CR | CR,TR,MP and GR |
| TRARI, Mekelle |  |  |  | CR,MP | CR,MP,TR,GR |
| Addis Ababa University | DR,GH,SH,MS |  |  | CR |  |
| University of Gondar | GH, MS, SH | CR | CR | DR | GR |
| Hawasa University | CR, TR, DR GH MS |  | MP and GR |  |  |
| Wolkiet University | GH,SH |  | CR & MP | GR |  |
| Haromaya University | DR,SH,MS |  | MP | MP | CR |
| Jimma University college of Agricultural and veternary medicine | SH |  |  | MP,TR, | MP,TR, |
| Jimma University Biology department | CR, DR,GH,SH | TR,MS |  | CR,TR,GR |  |

Note 1: Abbreviation of laboratory compartments **CR**=Cleaning room, **MP**=Media preparation **MS**=Media Storage, **TR**=transfer room, **GR**=growth room, **DR**=dark room, Greenhouse=**GH SH**=screen house

Note 2: Acronym of institute name (**NABRC**: National Agricultural Biotechnology Research Center; **MARC**: Melkassa Agricultural Research Centre; **JARC**: Jimma Agricultural Research Centre; **DZARC**: Debre Zeit Agricultural Research Centre; **ARARI**: Amhara Regional Agriculture Research Institute; **ORARI**: Oromia Regional Agriculture Research Institute; **SARI**: Southern Nations, Nationalities and People Region Agricultural Research Institute; **TARI:** Tigray Regional Agriculture Researcher Institute.
