# Supplementary material for: Plant Tissue Culture Research and Development in Ethiopia: A Case Study on Current Status, Opportunities, and Challenges
Source: Hindawi journal article supplement (doi:10.1155/2021/9979549), 2021-08-03
Supplement: f1 [file 9979549.f1.zip › 9979549.f1/Supplementary fiel 3 List of plant species which have been under plant tissue culture protocol optimization in Ethiopia.docx]

**Supplementary file 3**

List of plant species which have been under plant tissue culture protocols development for important crops in Ethiopia.

| **Plant Category** | **Common and Botanical Name** | **Main purpose of the Protocol** | **Statues of the Protocol** 1=scaled up 2=completed 3=ongoing | **Engaged Institutes** |
| --- | --- | --- | --- | --- |
|
| Root and tuber | Potato (Solanum tuberosum L.) | Mass propagation, virus cleaning and conservation | 1 | *ARARI, NABAC, ORARI, TARI, HAU, DessieTC, TBC,JUCAVM* |
| Sweet potato (*Ipomoea batatas)* | Mass propagation, virus cleaning and conservation | 1 | *NBAC/ ARARI,ORARI, SARI , HAU, TBC, AAU* |
| Enset *(Ensete ventricosum)* | Mass propagation | 2 | NBAC, SARI, HAU, WU, TBC, AAU |
| Cassava (*Manihot esculenta)* | Virus cleaning | 2 | NBAC, AAU |
| Anchote (*Coccinia abyssinica*) | Virus cleaning | 2 | NBAC, DARC |
| Yam (*Dioscorea spp)* | Mass propagation | 2 | JARC*,SARI, HAU |
| Tannia (*Xanthosoma sagittifolium* (L.) | Conservation | 3 | SARI |
| Taro (*Colocasia esculenta*) | Conservation | 3 | SARI |
| Fruits | Banana (*Musa spp*) | Mass propagation | 1 | MARC, ARARI,ORARI, SARI, Dessie TC, JUCAVM, TBC, Waginose BT |
| Pine apple (*Ananas comosus*) | Mass propagation | 1 | SARI, JARC, TBC, Waginose BT |
| Apple (*Malus domestica*) | Mass propagation | 2 | NBAC, WKU, JUCAVM, Bahirdar TC entrprise , TBC, AAU |
| Peach (*Prunus* *persica* L.) | Mass propagation | 2 | NBAC |
| Grape (*Vitis vinifera*) | Mass propagation | 2 | NBAC, DARC, TBC, AAU |
| Plum (*Prunus domestica*) | Mass propagation | 2 | NBAC |
| papaya (*Carica papaya)* | Mass propagation | 3 | TARI |
| Citrus ( *Citrus spp)* | Virus/bacteria cleaning | 2 | JUCAVM, TBC |
| Orange(*Citrus sinensis***)** | Mass propagation | 2 | TARI |
| Figs (*Ficus carica*) | Mass propagation | 2 | TBC |
| Cactus pear (*Opuntia ficus-indica****)*** | Mass propagation Conservation | 3 | TBC |
| commercial crops | Coffee (*Coffea arabica L.)* | Mass propagation | 2 | NABC, JARC, DARC, ORARI, AAU and TBC |
| Sugarcane (*Saccharum officinarum)* | Mass propagation | 1 | NABC, MARC, JUCAVM, AAU, TBC, Waginose BT |
| Damask rose (*Rosa damascene*) | Virus cleaning | 2 | TBC |
| Trees | Gaint bambo *(Bambusa oldhami)* | Mass propagation | 3 | ARARI, Bahirdar TC Enterprise, TBC |
| Frankincense(Boswellia sacra) | Mass propagation | 3 | ARARI, TARI |
| Lowland bamboo (*Oxytenanthera abyssinica)* | Mass propagation | 3 | NBAC |
| Rose gum (*Eucalyptus grandis)* | Mass propagation | 3 | Bahirdar TC enterprise and TBC |
| Jatropha *(Jatropha curcas)* | Mass propagation | 3 | NABC |
| Oil crops | Ethiopian mustard *(Brassica carinata )* | Regeneration  Haploid production | 2 | NBAC, AAU |
| Sesame (*Sesamum indicum*) | conservation | 2 | WKU |
| Niger Seed /Nug (*Guizotia abyssinica*) | Haploid | 2 | AAU |
| Medicinal plants and spices | Ginger (*Zingiber officinalis)* | Mass propagation, virus cleaning and conservation | 1 | SARI, ARARI, UoG, JARC, TBC, AAU |
| Turmeric (*Curcuma longa*) | Mass propagation and bacteria cleaning | 3 | JARC, TBC |
| Vanilla (*Vanilla planifolia*) | Mass propagation | 2 | JARC |
| Cardamom (*Elettaria cardamomum* ) | Mass propagation | 2 | JARC |
| Aloe *(Aloe vera)* | Mass propagation | 3 | HAU, TBC, Waginos BTC, |
| *Aloe debrana* | Conservation | 3 | Waginose BT |
| Ethiopian cardamom (*Aframomum corrorima)* | Mass propagation | 3 | AAU, JARC |
| Artimisia (*Artimisia spp* ) | mass propagation | 2 | JARC |
| Endod (*Phytolacca dodecandra***)** | Mass propagation | 2 | JARC, TBC |
| Kebericho (*Echinops kebericho*) | Mass propagation | 2 | AAU |
| *Oreosyce africana* | Mass propagation | 3 | AAU |
| Dingetegna (*Taverniera abyssinica*) | Mass propagation | 2 | AAU |
| Damascisa  (*Glinus lotoides)* | Mass propagation | 3 | AAU |
| Aloysia (*Aloysia citrodora)* | Mass propagation | 2 | NBAC |
| Stevia (*Stevia rebaudiana*) | Mass propagation | 2 | JARC |
| *Satureja abyssinica* | Mass propagation | 3 | AAU |
| African violet (*Saintpaulia ionantha)* | Mass propagation | 3 | Waginose BT |
| Barbados nut *(Jatropha curcas)* | Mass propagation | 2 | NABC |
| Vegetable | Okra (*Abelmoschus esculentus)* | Mass propagation | 3 | HWU, AAU |
| Garlic (*Allium sativum*) | virus ceaning | 2 | DARC, JUCAVM |
| Shallot (*Allium cepa)* |  | 2 | DARC |
| Tomato (*Solanum lycopersicum)* | Virus/bacteria cleaning | 2 | JUCAVM |
| Moringa*(Moringa oleifera)* | clonal mass propagation | 2 | JUCAVM |
| Cereal | Teff (*Eragrostis tef*) | Haploid and Embryo rescue | 3 | DARC, AAU |
| Wheat (*Triticum Spp*) | Haploid | 3 | AAU |

NABRC: National Agricultural Biotechnology Research Center; MARC: Melkassa Agricultural Research Centre; JARC: Jimma Agricultural Research Centre; DZARC: Debre Zeit Agricultural Research Centre; ARARI: Amhara Regional Agriculture Research Institute; ORARI: Oromia Regional Agriculture Research Institute; SARI: Southern Nations, Nationalities and People Region Agricultural Research Institute; TARI: Tigray Regional Agriculture Researcher Institute. AAU: Addis Ababa University; UoG: University of Gonder; HwU: Hawassa University; JUCAVM: Jimma University college of Agriculture and Veterinary Medicine; WU: Wolkite University.
